# Supplementary material for: Conformational change-based fluorometric aptasensor for sensitive cadmium(ii) detection in fruits and vegetables
Source: Royal Society of Chemistry journal article supplement (doi:10.1039/d4ay01333f), 2024-01-01
Supplement: d4ay01333f1.pdf [file d4ay01333f1.pdf]

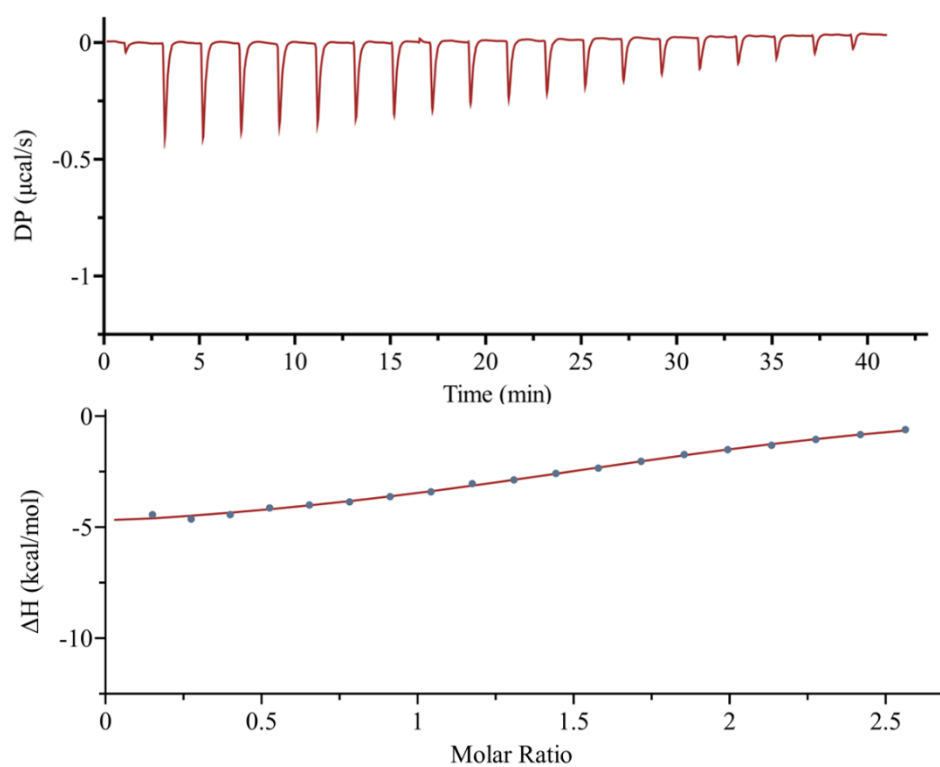

**Figure S1.** Binding affinity of Cd-(21) with  $\text{Cd}^{2+}$  by ITC assay.

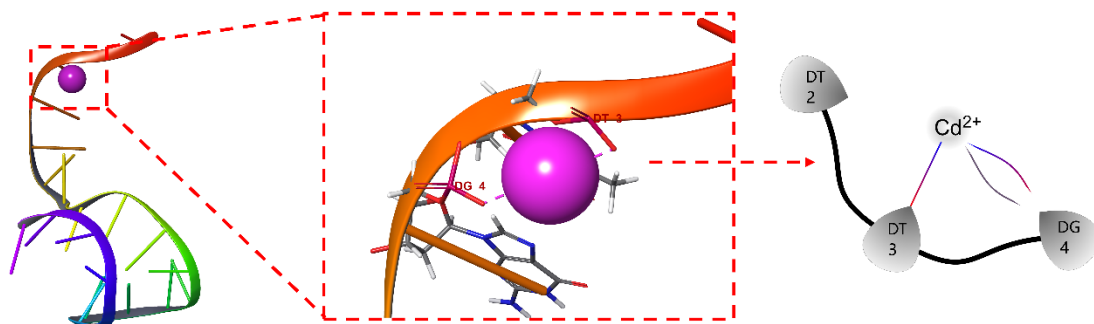

**Figure S2.** 2D and 3D molecular docking illustrations between  $\text{Cd}^{2+}$  and Cd-(21).
